# Supplementary material for: A Novel Dialkylamino-Functionalized Chalcone, DML6, Inhibits Cervical Cancer Cell Proliferation, In Vitro, via Induction of Oxidative Stress, Intrinsic Apoptosis and Mitotic Catastrophe
Source: MDPI journal article supplement (doi:10.3390/molecules26144214), 2021-07-11
Supplement: s1 [file s1]

# Supplementary Material: A Novel Dialkylamino-Functionalized Chalcone, DML6, Inhibits Cervical Cancer Cell Proliferation, In Vitro, via Induction of Oxidative Stress, Intrinsic Apoptosis and Mitotic Catastrophe

Jenna M Len<sup>1‡</sup>, Noor Hussein<sup>1‡</sup>, Saloni Malla<sup>1‡</sup>, Kyle McIntosh<sup>1</sup>, Rahul Patidar<sup>3</sup>, Manivannan Elangovan<sup>3\*</sup>, Karthikeyan Chandrabose<sup>4</sup>, N. S. Hari Narayana Moorthy<sup>4</sup>, Manoj Pandey<sup>5</sup>, Dayanidhi Raman<sup>2</sup>, Piyush Trivedi<sup>6</sup>, Amit K. Tiwari<sup>1,2,\*</sup>

**Table S1.** The antiproliferative efficacy of the DML1-DML12 compounds on the proliferation of cervical cancer cell line.

| Comp Code   | IC <sub>50</sub> ± SD (μM) |
|-------------|----------------------------|
|             | Cervical HeLa              |
| DML1        | 70.69 ± 2.19               |
| DML2        | >100                       |
| DML3        | >100                       |
| DML4        | 39.47 ± 11.44              |
| DML5        | 73.38 ± 4.81               |
| <b>DML6</b> | <b>9.08 ± 0.69</b>         |
| DML7        | >100                       |
| DML8        | >100                       |
| DML9        | >100                       |
| DML10       | >100                       |
| DML11       | >100                       |
| DML12       | >100                       |

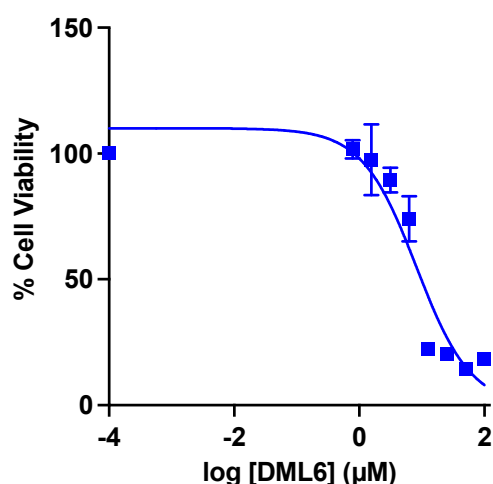

**Figure S1.** The efficacy of DML6 in HeLa cancer cells. The cell-viability curve produced by HeLa cells treated with vehicle (0 μM), 5 or 10 μM of **DML6** after 72 h of incubation. Cell survival was determined using the MTT assay. The IC<sub>50</sub> values are represented as the means ± SD of three independent experiments performed in triplicate.
